# Supplementary material for: Transcript isoform sequencing reveals widespread promoter-proximal transcriptional termination in Arabidopsis
Source: PubMed Central journal article supplement (PMC7244574; doi:10.1038/s41467-020-16390-7), 2020-05-22
Supplement: 41467_2020_16390_MOESM3_ESM.pdf [file 41467_2020_16390_MOESM3_ESM.pdf]

## **Description of Additional Supplementary Files**

File Name: Supplementary Data 1

Description: Genes with sppRNA detected at 22C and GO-term enrichment results.

File Name: Supplementary Data 2

Description: Oligonucleotides used in the study.

File Name: Supplementary Data 3

Description: Genome coordinates of all sppRNAs clusters per TIF-Seq dataset.
